# Supplementary material for: Copolymers of bipyridinium and metal (Zn & Ni) porphyrin derivatives; theoretical insights and electrochemical activity towards CO2
Source: Royal Society of Chemistry journal article supplement (doi:10.1039/d1ra01945g), 2021-01-01
Supplement: d1ra01945g1.pdf [file d1ra01945g1.pdf]

## Supporting information

### Copolymers of bipyridinium and Metal (Zn & Ni) porphyrin derivatives, theoretical insight and their electrochemical activity towards CO<sub>2</sub>

Sachin Kochrekar,<sup>a,b</sup> Ajit Kalekar,<sup>b</sup> Shweta Mehta,<sup>c,d</sup> Pia Damlin,<sup>b</sup> Mikko Salomäki,<sup>b</sup> Sari Granroth,<sup>e</sup> Niko Meltola,<sup>f</sup> Kavita Joshi,<sup>c,d</sup> Carita Kvarnström<sup>b,\*</sup>

<sup>a</sup>Turku University Graduate School (UTUGS) Doctoral Programme in Physical and Chemical Sciences, FI-20014 Turku, Finland

<sup>b</sup>Turku University Centre for Materials and Surfaces (MatSurf), Department of Chemistry, University of Turku, Vatselankatu 2, FI-20014 Turku, Finland.

<sup>c</sup>Physical and Materials Chemistry Division, CSIR-National Chemical Laboratory, Pune 411008 India.

<sup>d</sup>Academy of Scientific and Innovative Research (AcSIR), Anusandhan Bhawan, 2, Rafi Marg, New Delhi – 110001, India.

<sup>e</sup>Laboratory of Materials Science, University of Turku, FI-20014, Turku, Finland.

<sup>f</sup>ArcDia International Oy Ltd, Lemminkäisenkatu 32, FI-20521-Turku, Finland.

Corresponds to: carkva@utu.fi

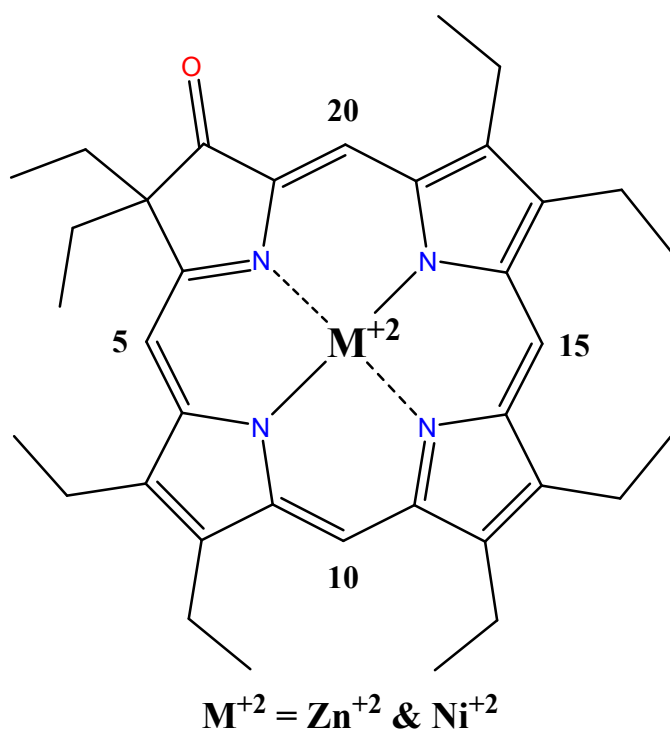

**Scheme S1:** representation of metal (Zinc and Nickel) Octaethyl porphyrin ketone.

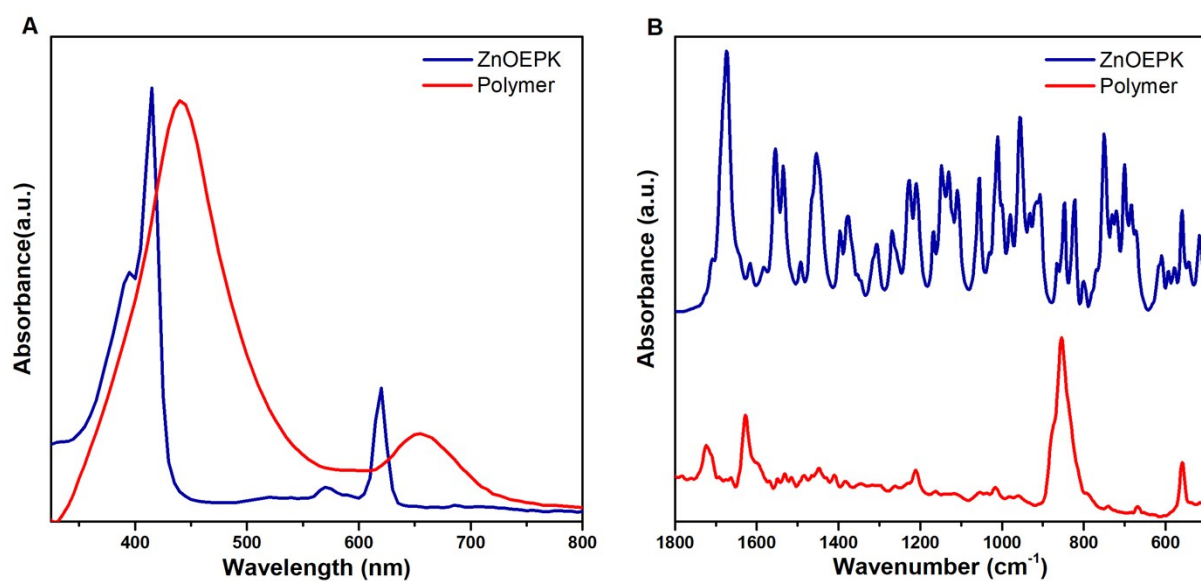

**Fig S1** A) UV-Vis absorption(A) and FTIR(B) spectra of ZnOEPK monomer and copolymer film .

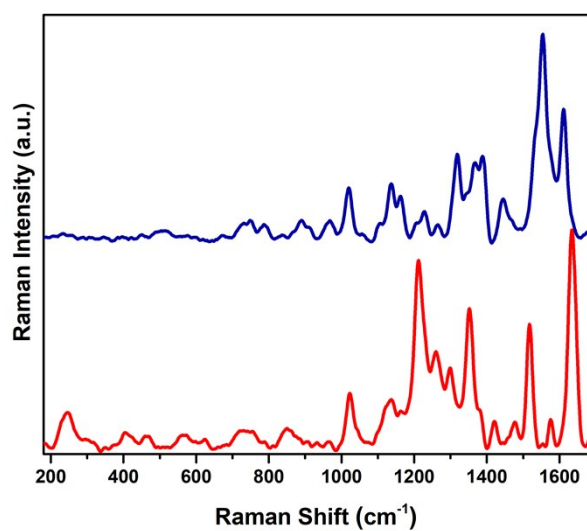

**Fig S2** Raman spectra of poly ZnEOPK on FTO (red) and ZnOEPK monomer (blue)

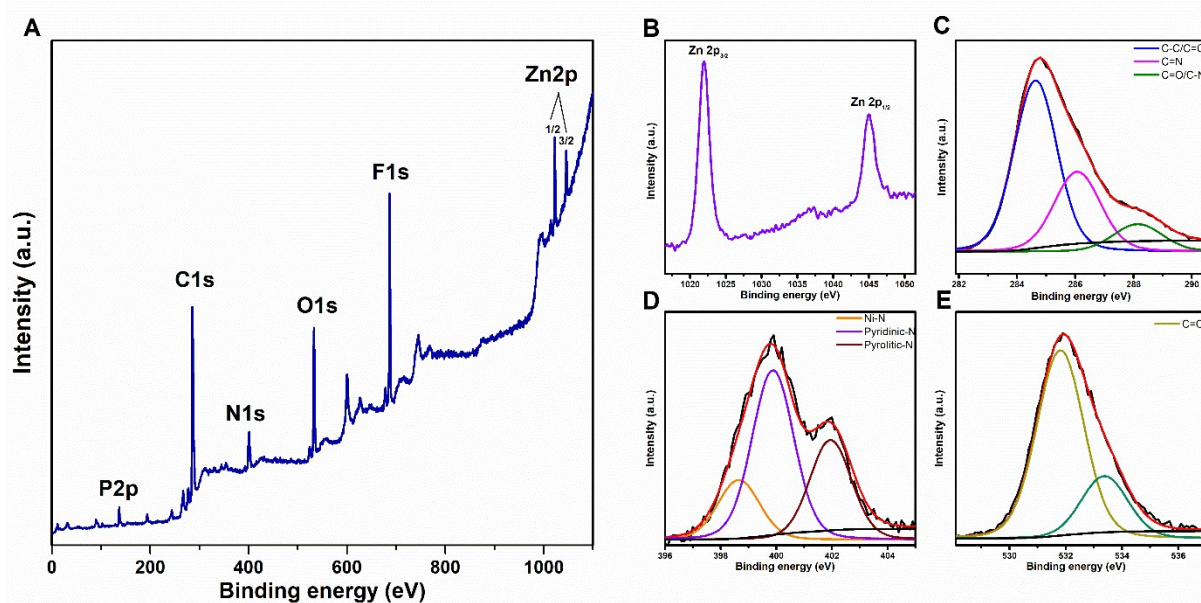

Fig S3 XPS spectra of Poly ZnEOPK (A), Ni(B), carbon(C), Nitrogen(D) and Oxygen(E).

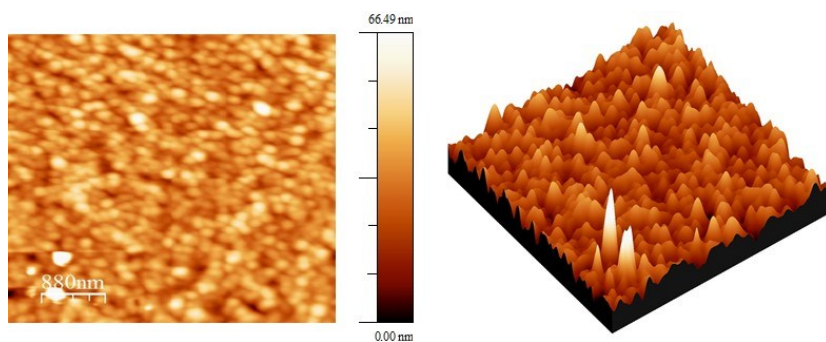

Fig S4 AFM image of poly ZnOEPK on FTO electrode as 2D (A) and 3D (B) view.

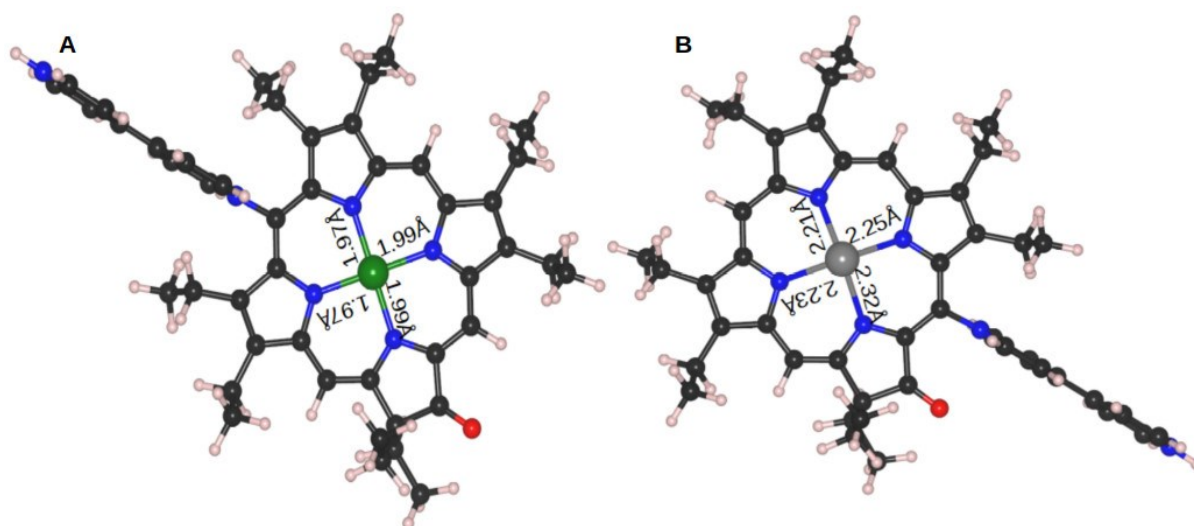

Fig S5 4,4'-Bpy attached to the meso position nearest in NiOEPK(A) farthest meso position in ZnOEPK(B) to the keto group.

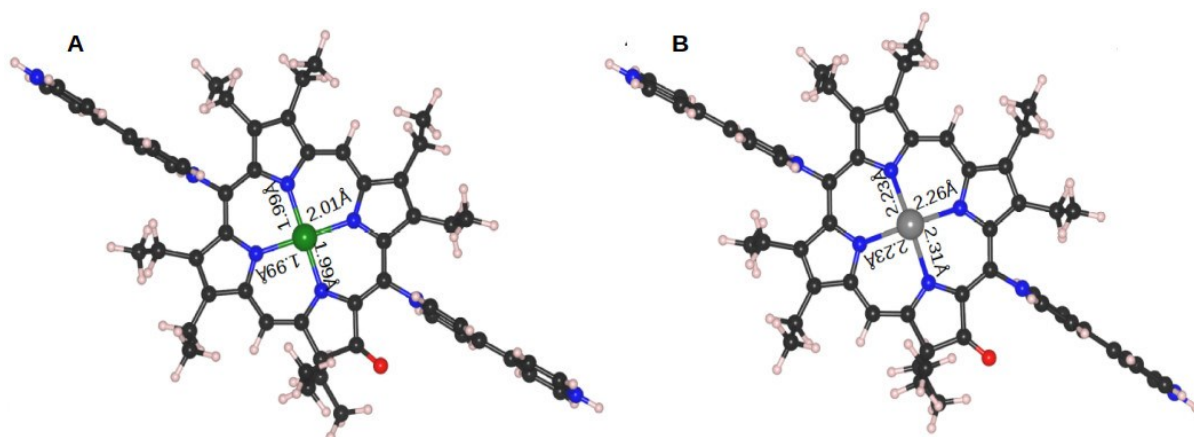

**Fig S6:** (A) second 4,4'-Bpy attached to the meso position opposite to the first one in Ni-OEPK(fig 4A) and (B) to the nearest meso position and opposite to the first 4,4'-Bpy unit in ZnOEPK(fig 4B).

Below tables are for the relative energies of attachment of 4, 4'-bpy on various meso positions. The energies are calculated with reference to thermodynamically most stable position.

**Table S1: Zn 1<sup>st</sup> Bipyridine at various meso position:**

| Meso position | dE (eV) |
|---------------|---------|
| 20            | 0       |
| 5             | 0.0157  |
| 15            | 0.0248  |
| 10            | 0.0528  |

**Table S2: Zn 2<sup>nd</sup> Bipyridine at various meso position :**

| Meso position | dE (eV) |
|---------------|---------|
| 10            | 0       |
| 15            | 0.1052  |
| 5             | 0.1072  |

**Table S3: Ni 1<sup>st</sup> Bipyridine at various meso position :**

| <b>Meso position</b> | <b>dE (eV)</b> |
|----------------------|----------------|
| 10                   | 0              |
| 15                   | 0.0331         |
| 5                    | 0.0493         |
| 20                   | 0.1088         |

**Table S4: Ni 2<sup>nd</sup> Bipyridine at various meso position:**

| <b>Meso position</b> | <b>dE (eV)</b> |
|----------------------|----------------|
| 20                   | 0              |
| 5                    | 0.1691         |
| 15                   | 0.2878         |
